# Supplementary material
Source: ML conference proceedings conference paper supplement (https://openaccess.thecvf.com/content/CVPR2024/html/Yang_Probabilistic_Speech-Driven_3D_CVPR_2024_paper.html)
Supplement: Supplementary file 1 [file Yang_Probabilistic_Speech-Driven_3D_CVPR_2024_supplemental.zip]

Archive with 4 entries (4 files):
- 13994_supp.pdf
- __MACOSX/._13994_supp.pdf
- 13994_video.mp4
- __MACOSX/._13994_video.mp4
